# Supplementary material for: Energy transfer process in an unsymmetrical crown-containing bisstyryl dye incorporated in the cavities of CB[7] and 2-hydroxypropyl-β-CD
Source: Royal Society of Chemistry journal article supplement (doi:10.1039/c9nj05915f), 2020-01-01
Supplement: c9nj05915f1.pdf [file c9nj05915f1.pdf]

## **Energy transfer process in unsymmetrical crown-containing bisstyryl dye incorporated in the cavities of CB[7] and 2-hydroxypropyl- $\beta$ -CD**

Anna Y. Ruleva, Vladimir B. Tsvetkov, Yuri V. Fedorov, Ekaterina Y. Chernikova,  
Nikolay E. Shepel, Ivan A. Godovikov, Olga A. Fedorova

### **Content**

|                              |                |
|------------------------------|----------------|
| 1. NMR spectra               | Figs. S1-S8    |
| 2. Electrochemical data      | Figs, S10-S15  |
| 3. ESI-MS spectra            | Figs. S16, S17 |
| 4. Optical spectra           | Figs. S18- S20 |
| 5. MolecularModeling Results | Figs S21-S27   |

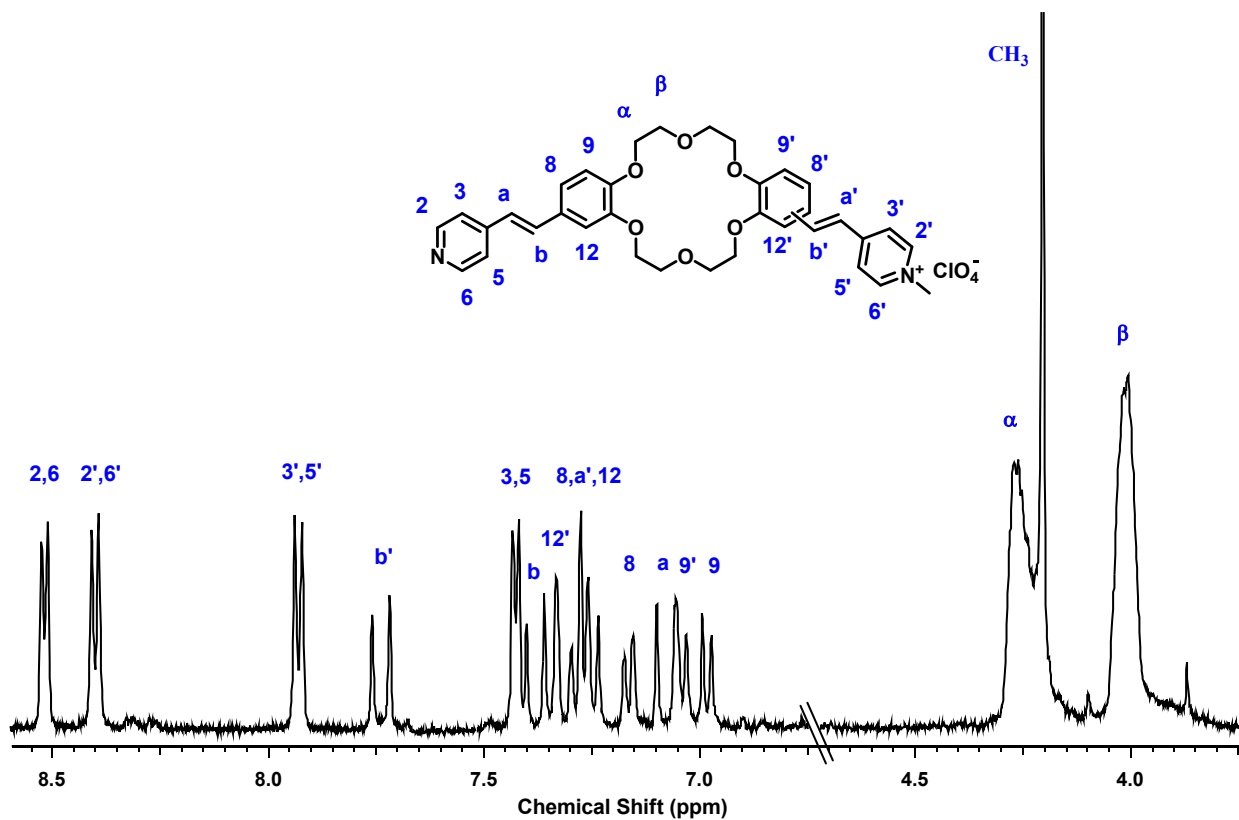

Fig. S1. –  $^1\text{H}$  NMR spectra of bisstyryl dye 1 in  $\text{CD}_3\text{CN}$ .

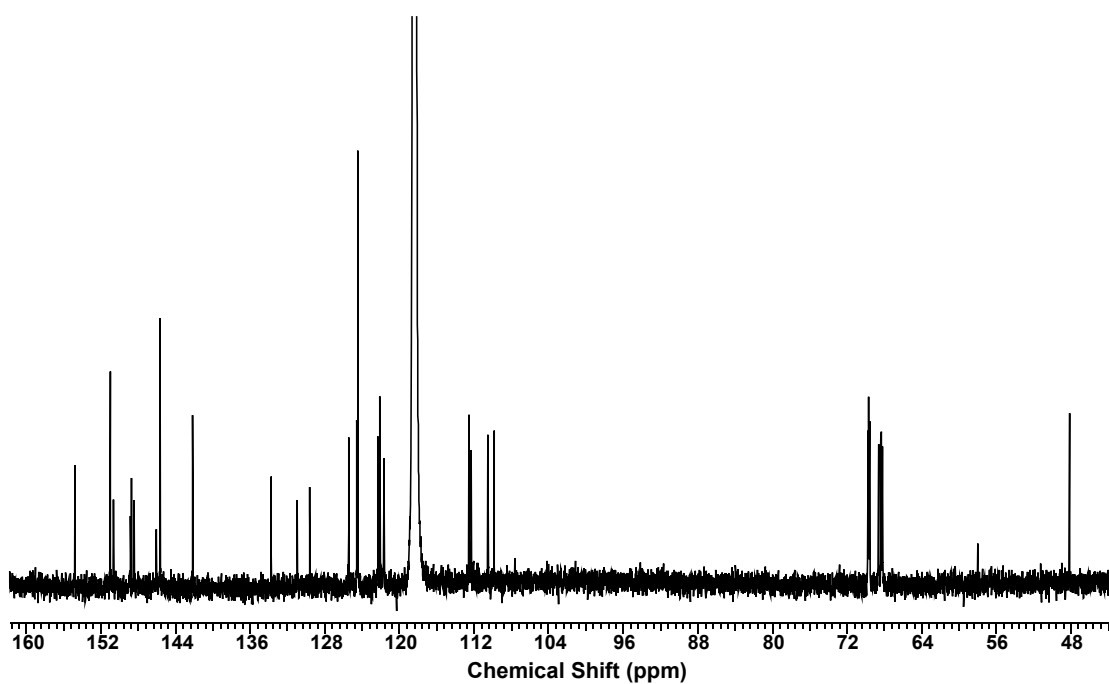

Fig. S2. –  $^{13}\text{C}$  NMR spectra of bisstyryl dye 1 in  $\text{CD}_3\text{CN}$ .

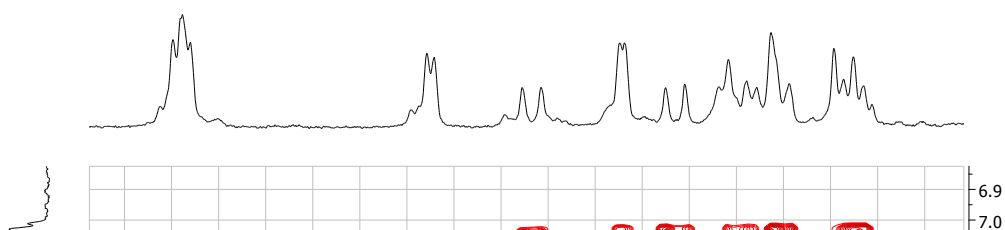

**Figure S3.** Fragments of the COSY spectrum of free **1** (400 MHz, 298 K, D<sub>2</sub>O-CD<sub>3</sub>CN (3:1), C<sub>1</sub> = 2·10<sup>-3</sup>M)

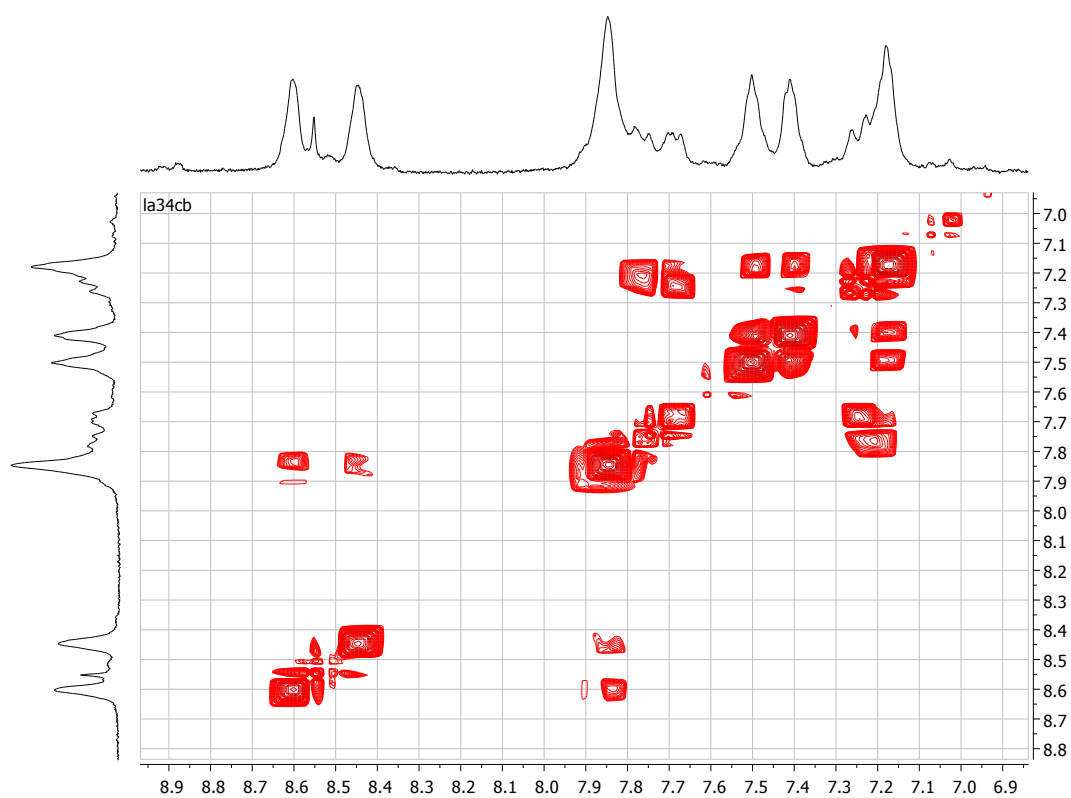

**Figure S4.** Fragments of the COSY spectrum of **1** in the presence of CB[7] (400 MHz, 298 K, D<sub>2</sub>O-CD<sub>3</sub>CN (3:1), C<sub>1</sub> = 2·10<sup>-3</sup>M, C<sub>CB[7]</sub> = 1·10<sup>-3</sup>M)

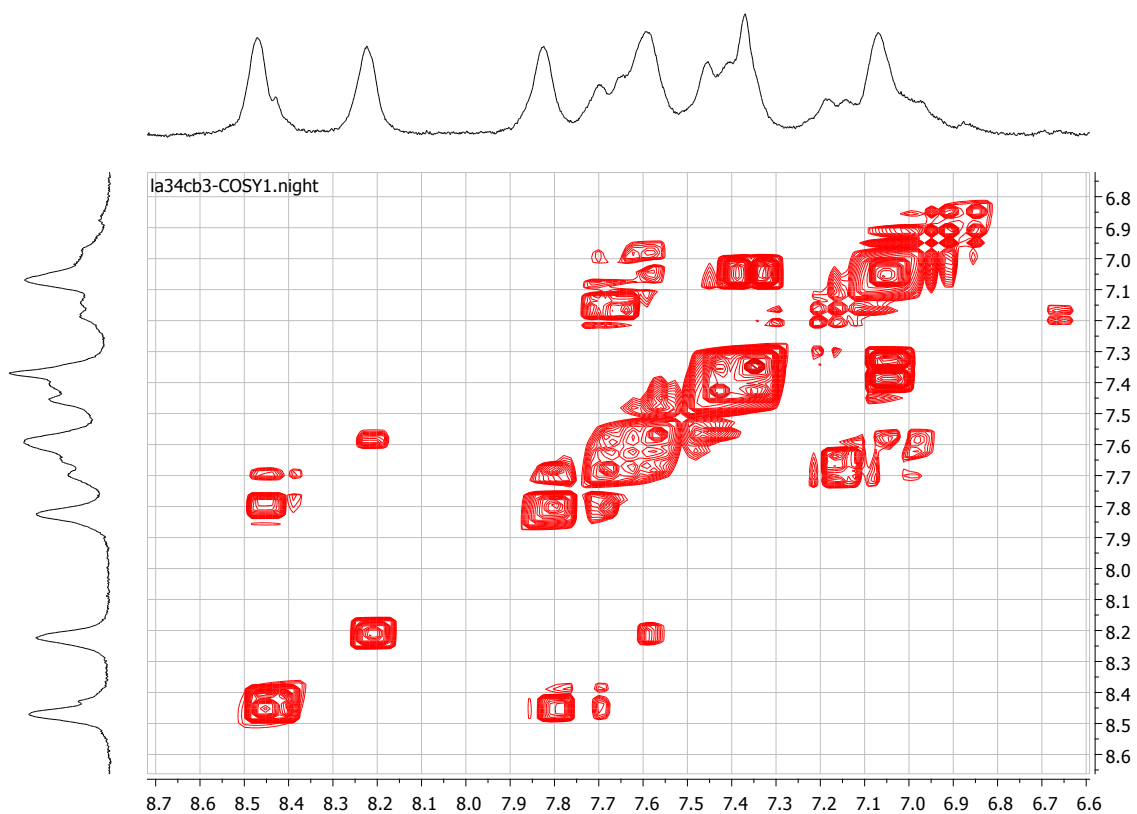

**Figure S5.** Fragments of the COSY spectrum of **1** in the presence of CB[7] (400 MHz, 298 K, D<sub>2</sub>O-CD<sub>3</sub>CN (3:1), C<sub>1</sub> = 2 · 10<sup>-3</sup>M, C<sub>CB[7]</sub> = 2 · 10<sup>-3</sup>M)

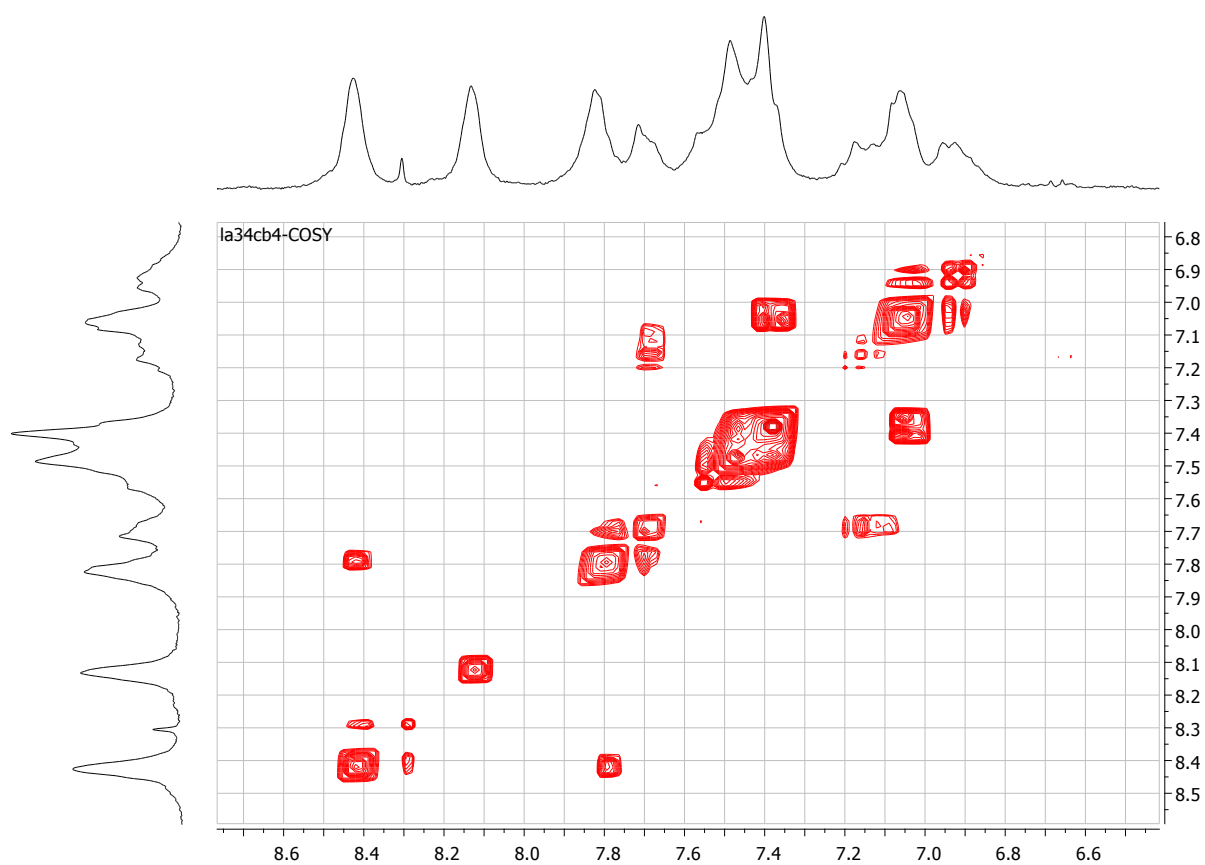

**Figure S6.** Fragments of the COSY spectrum of **1** in the presence of CB[7] (400 MHz, 298 K, D<sub>2</sub>O-CD<sub>3</sub>CN (3:1), C<sub>1</sub> = 2 · 10<sup>-3</sup>M, C<sub>CB[7]</sub> = 3 · 10<sup>-3</sup>M)

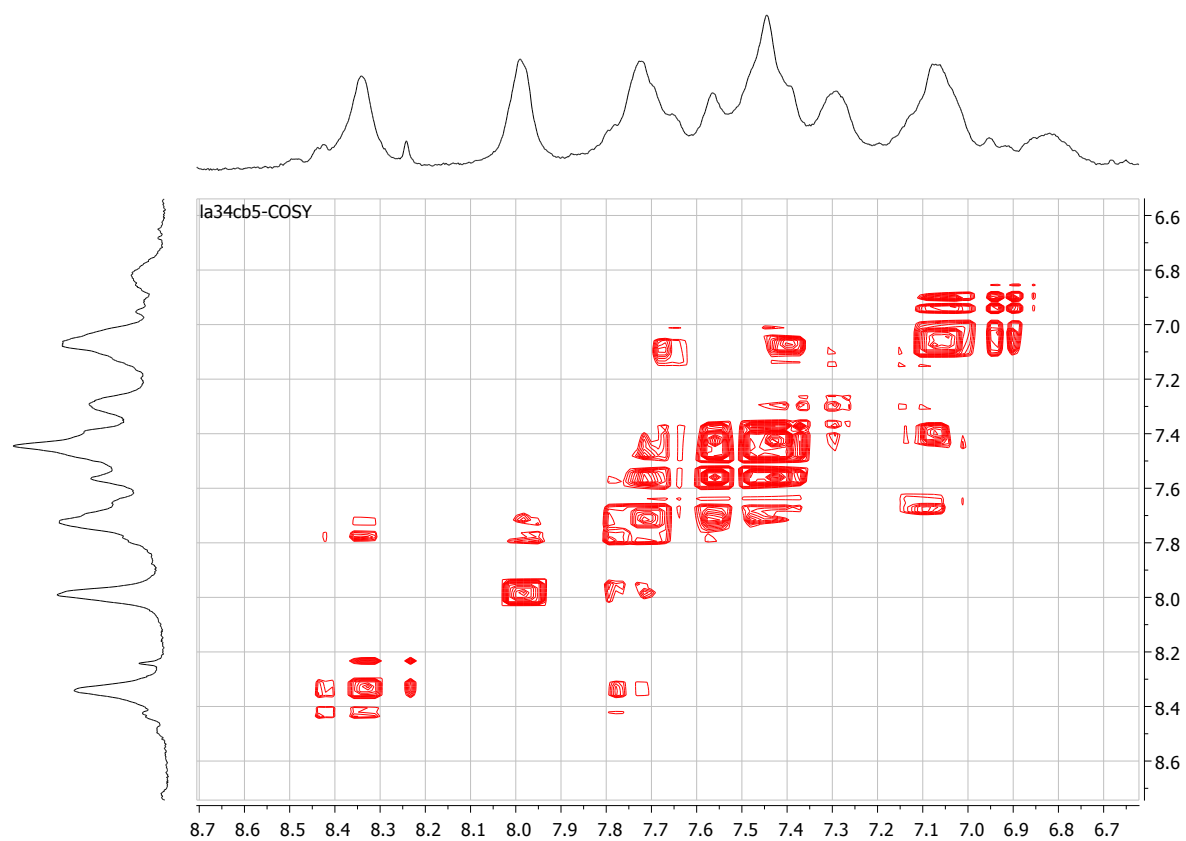

**Figure S7.** Fragments of the COSY spectrum of **1** in the presence of CB[7] (400 MHz, 298 K, D<sub>2</sub>O-CD<sub>3</sub>CN (3:1), C<sub>1</sub> = 2·10<sup>-3</sup>M, C<sub>CB[7]</sub> = 5·10<sup>-3</sup>M)

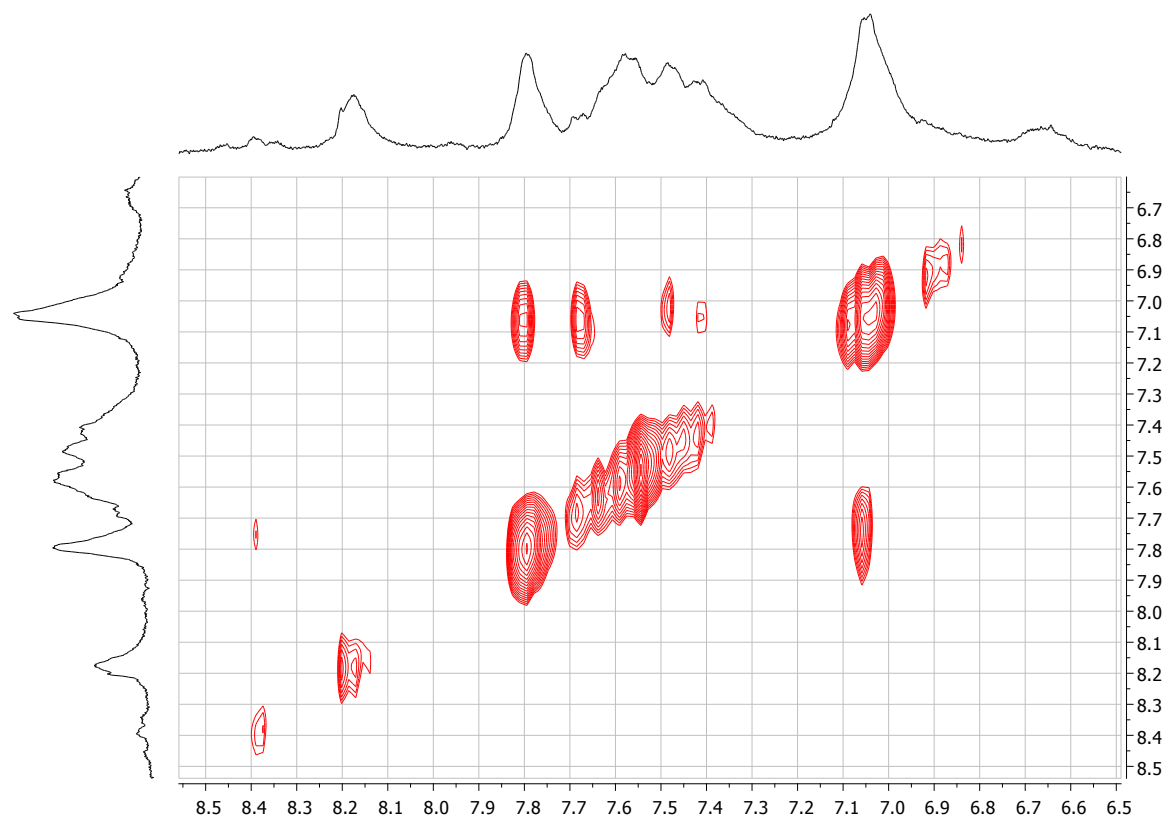

**Figure S8.** Fragments of the COSY spectrum of **1** in the presence of CB[7] (400 MHz, 298 K, D<sub>2</sub>O-CD<sub>3</sub>CN (3:1), C<sub>1</sub> = 2·10<sup>-3</sup>M, C<sub>CB[7]</sub> = 1·10<sup>-2</sup>M)

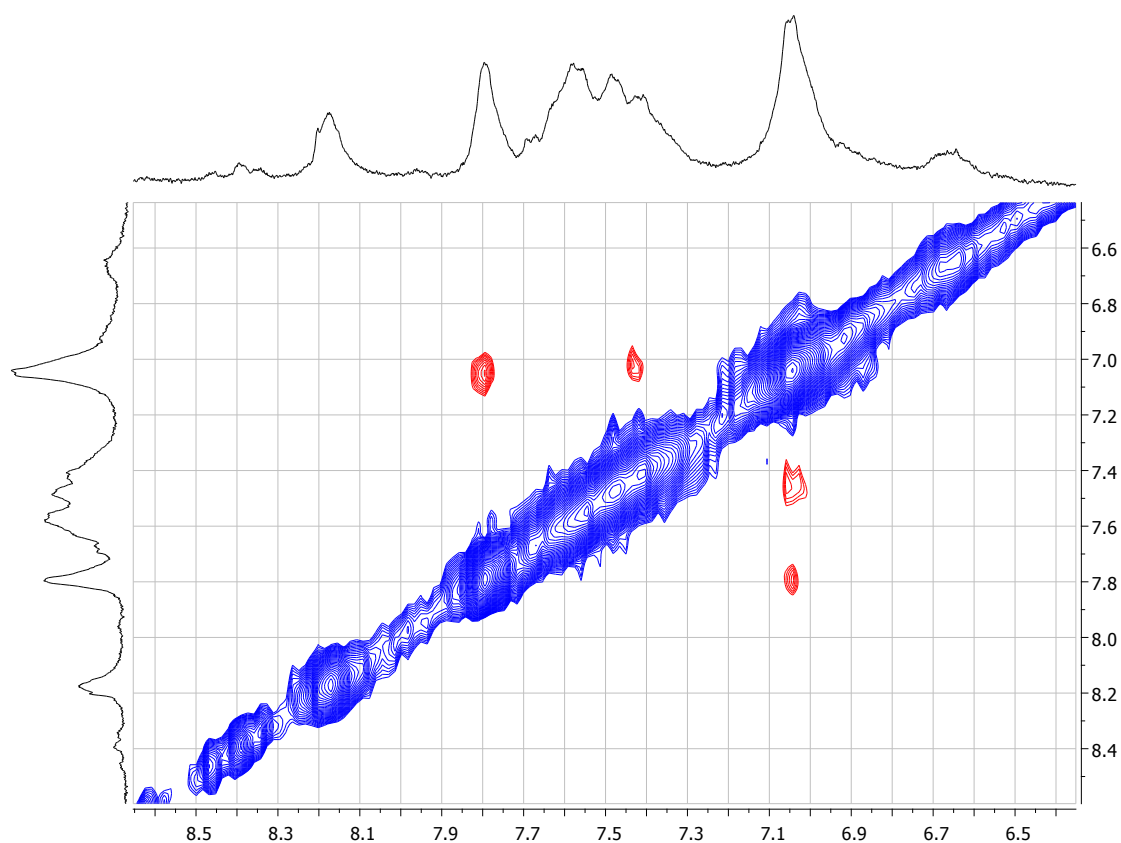

**Figure S9.** Fragments of the ROESY spectrum of **1** in the presence of CB[7] (400 MHz, 298 K, D<sub>2</sub>O-CD<sub>3</sub>CN (3:1), C<sub>1</sub> = 2 · 10<sup>-3</sup>M, C<sub>CB[7]</sub> = 1 · 10<sup>-2</sup>M)

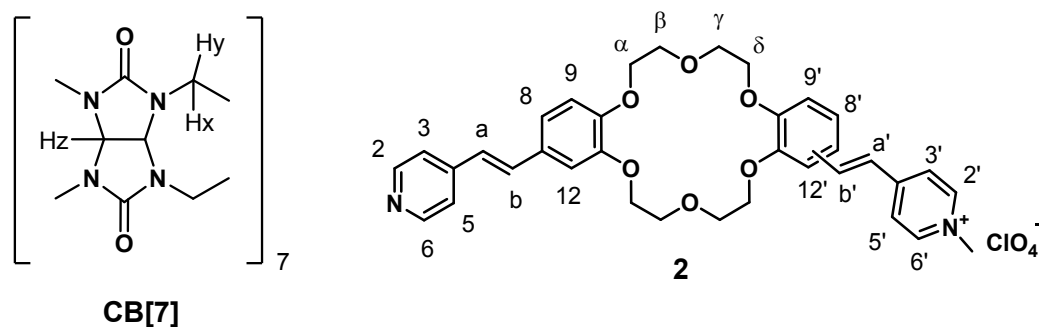

**CB[7].** C<sub>CB[7]</sub> = 1 · 10<sup>-3</sup>M. <sup>1</sup>H NMR (400 MHz, D<sub>2</sub>O:CD<sub>3</sub>CN (3:1), δ, ppm): 4.32 (d, 14H, H(y), J = 15.3), 5.59 (s, 14H, H(z)), 5.99 (d, 14H, H(x), J = 15.3).

**Dye 1.** C<sub>1</sub> = 2 · 10<sup>-3</sup>M. <sup>1</sup>H NMR (400 MHz, D<sub>2</sub>O:CD<sub>3</sub>CN (3:1), δ, ppm): 4.17-4.01 (m, 8H, H-β, H-γ); 4.35 (s, 3H, CH<sub>3</sub>), 4.43-4.30 (m, 8H, H-α, H-δ), 7.24-7.13 (m, 3H, H-9, H-9', H-a), 7.49-7.29 (m, 5H, H-8, H-12, H-a', H-8', H-12'), 7.56 (d, 1H, H-b, J<sub>trans</sub> = 16.4), 7.67 (d, 2H, H-3, H-5, J = 5.5), 7.86 (d, 1H, H-b', J<sub>trans</sub> = 16.0), 8.08 (d, 2H, H-3', H-5', J = 6.6), 8.64-8.56 (m, 4H, H-2', H-6', H-2, H-6).

**Mixture dye 1 and CB[7] (1:0.5).**  $C_1 = 2 \cdot 10^{-3}M$ ,  $C_{CB[7]} = 1 \cdot 10^{-3}M$ .  $^1H$  NMR (400 MHz,  $D_2O:CD_3CN$  (3:1),  $\delta$ , ppm): 4.18-4.06 (m, 8H, H- $\beta$ , H- $\gamma$ ), 4.44-4.26 (m, 25H, H(y),  $CH_3$ , H- $\alpha$ , H- $\delta$ ), 5.59 (s, 14H, H(z)), 5.99 (d, 14H, H(x),  $J = 15.3$ ), 7.29-7.11 (m, 4H, H-9, H-9', H-a, H-a'), 7.45-7.35 (m, 2H, H-8, H-12), 7.56-7.46 (m, 2H, H-8', H-12'), 7.79 (d, 1H, H-b,  $J_{trans} = 15.9$ ), 7.77 (d, 1H, H-b',  $J_{trans} = 15.5$ ), 7.94-7.80 (m, 4H, H-3, H-5, H-3', H-5'), 8.45 (br. s, 2H, H-2', H-6'), 8.60 (br. s, 2H, H-2, H-6).

**Mixture dye 1 and CB[7] (1:1).**  $C_1 = 2 \cdot 10^{-3}M$ ,  $C_{CB[7]} = 2 \cdot 10^{-3}M$ .  $^1H$  NMR (400 MHz,  $D_2O:CD_3CN$  (3:1),  $\delta$ , ppm): 4.19-4.06 (m, 8H, H- $\beta$ , H- $\gamma$ ), 4.42-4.24 (m, 25H, H(y),  $CH_3$ , H- $\alpha$ , H- $\delta$ ), 5.59 (s, 14H, H(z)), 5.89 (d, 14H, H(x),  $J = 15.2$ ), 7.21-7.04 (m, 3H, H-a', H-9, H-9'), 7.27 (d, 1H, H-a,  $J_{trans} = 16.0$ ), 7.60-7.39 (m, 4H, H-8, H-12, H-8', H-12'), 7.86-7.64 (m, 4H, H-3', H-5', H-b, H-b'), 7.93 (br. s, 2H, H-3, H-5), 8.33 (br. s, 2H, H-2', H-6'), 8.58 (br. s, 2H, H-2, H-6).

**Mixture dye 1 and CB[7] (1:1.5).**  $C_1 = 2 \cdot 10^{-3}M$ ,  $C_{CB[7]} = 3 \cdot 10^{-3}M$ .  $^1H$  NMR (400 MHz,  $D_2O:CD_3CN$  (3:1),  $\delta$ , ppm): 4.19-4.06 (m, 8H, H- $\beta$ , H- $\gamma$ ), 4.42-4.22 (m, 25H, H(y),  $CH_3$ , H- $\alpha$ , H- $\delta$ ), 5.58 (s, 14H, H(z)), 5.87 (d, 14H, H(x),  $J = 15.6$ ), 7.05 (d, 1H, H-a',  $J_{trans} = 16.4$ ), 7.34-7.10 (m, 3H, H-9, H-9', H-a), 7.72-7.42 (m, 7H, H-8, H-12, H-8', H-12', H-3', H-5', H-b'), 7.81 (d, 1H, H-b,  $J_{trans} = 16.4$ ), 7.93 (br. s, 2H, H-3, H-5), 8.24 (br. s, 2H, H-2', H-6'), 8.54 (br. s, 2H, H-2, H-6).

**Mixture dye 1 and CB[7] (1:2.5).**  $C_1 = 2 \cdot 10^{-3}M$ ,  $C_{CB[7]} = 5 \cdot 10^{-3}M$ .  $^1H$  NMR (400 MHz,  $D_2O:CD_3CN$  (3:1),  $\delta$ , ppm): 4.19-4.06 (m, 8H, H- $\beta$ , H- $\gamma$ ), 4.42-4.22 (m, 25H, H(y),  $CH_3$ , H- $\alpha$ , H- $\delta$ ), 5.58 (s, 14H, H(z)), 5.87 (d, 14H, H(x),  $J = 15.6$ ), 6.93 (br. s, 1H, H-a'), 7.29-7.08 (m, 3H, H-9, H-9', H-a), 7.40 (br. s, 2H, H-3', H-5'), 7.92-7.46 (m, 8H, H-8, H-12, H-8', H-12', H-b, H-b', H-3, H-5), 8.10 (br. s, 2H, H-2', H-6'), 8.54 (br. s, 2H, H-2, H-6).

**Mixture dye 1 and CB[7] (1:5).**  $C_1 = 2 \cdot 10^{-3}M$ ,  $C_{CB[7]} = 1 \cdot 10^{-2}M$ .  $^1H$  NMR (400 MHz,  $D_2O:CD_3CN$  (3:1),  $\delta$ , ppm): 4.20-4.05 (m, 8H, H- $\beta$ , H- $\gamma$ ), 4.42-4.22 (m, 25H, H(y),  $CH_3$ , H- $\alpha$ , H- $\delta$ ), 5.56 (s, 14H, H(z)), 5.85 (d, 14H, H(x),  $J = 15.2$ ), 6.78 (br. s, 1H, H-a'), 7.28-7.03 (m, 6H, H-9, H-9', H-a, H-3', H-5', H-b'), 7.83-7.40 (m, 7H, H-8, H-12, H-8', H-12', H-b, H-3, H-5), 7.92 (br. s, 2H, H-2', H-6'), 8.30 (br. s, 2H, H-2, H-6).

### Electrochemistry studies

Electrochemical measurements were carried out at 22 °C with an IPC-ProM potentiostat. Cyclic voltammetry experiments were performed in a 1.0 mL cell equipped with a glassy carbon (GC) electrode (disk  $d = 2$  mm), Ag/AgCl/KCl (aq. saturated; reference electrode), and platinum electrode (counter electrode). Compounds were dissolved in degassed dry CH<sub>3</sub>CN or DMF containing TBAP as the supporting electrolyte (0.1 M). Dry argon gas was bubbled through the solutions for 30 min before cyclic voltammetry experiments. The scan rate was 200 mV s<sup>-1</sup>.

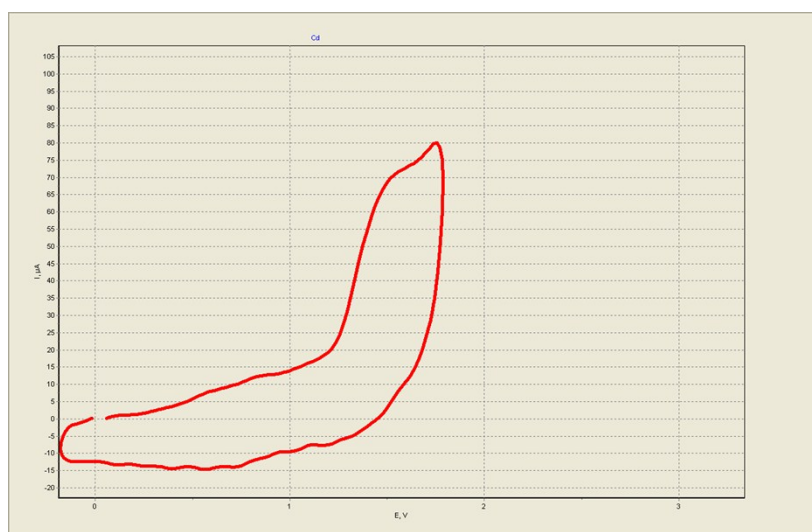

**Fig. S10.** Cyclic voltammograms of **3** obtained on GC electrode,  $E_0=1.48$ V 57mkA.

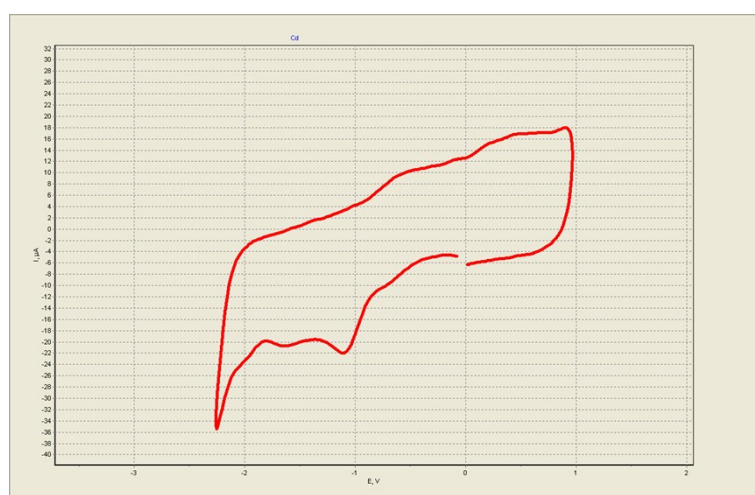

**Fig. S11.** Cyclic voltammograms of **3** obtained on GC electrode,  $E_0=-1.03$ V 12mkA.



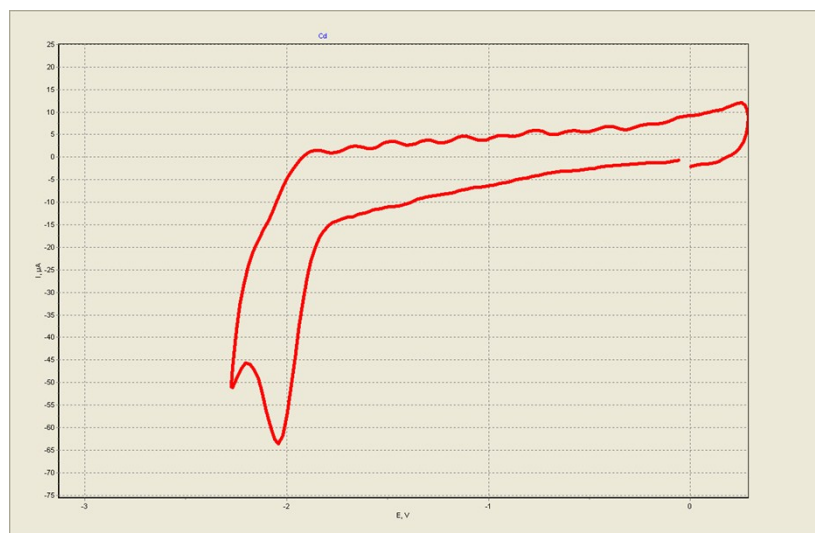

**Fig. S12.** Cyclic voltammograms of **2** obtained on GC electrode,  $E_0 = -1.98\text{V}$  51mA

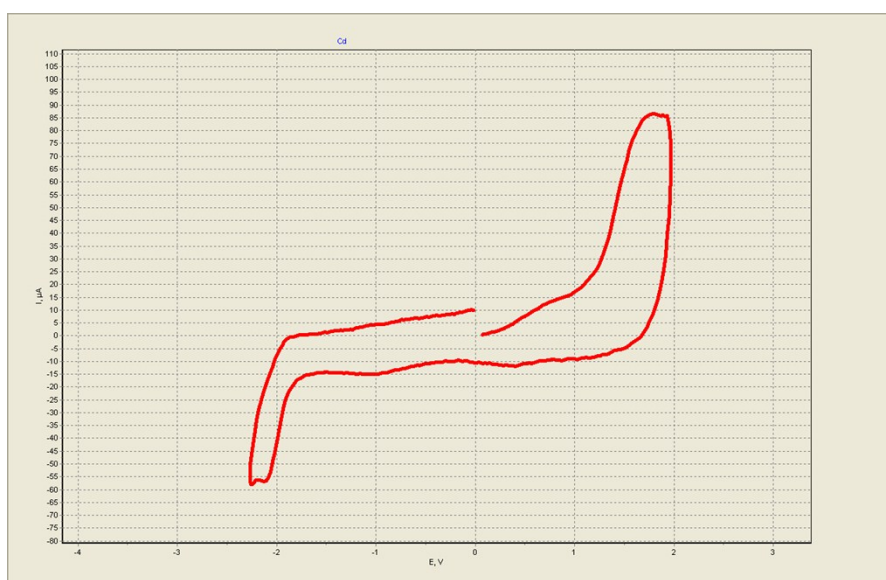

**Fig. S13.** Cyclic voltammograms of **2** obtained on GC electrode,  $E_0 = -1.98\text{V}$  42mA

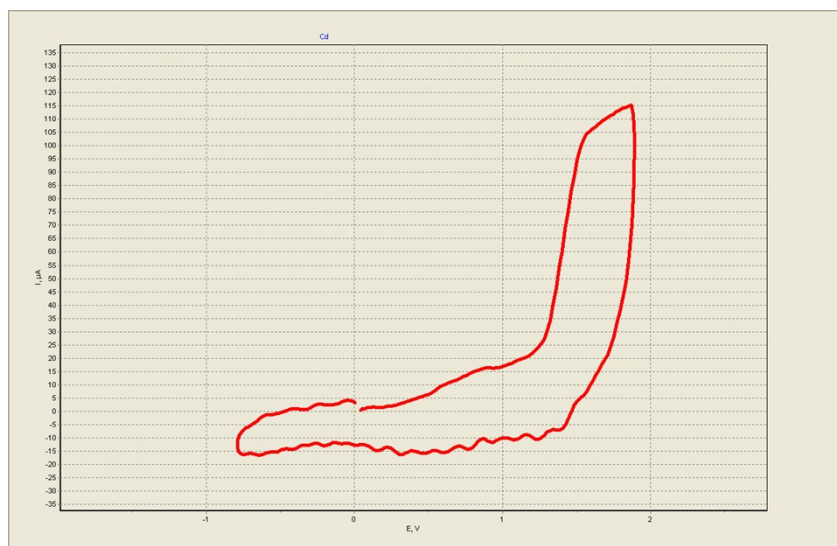

**Fig. S14.** Cyclic voltammograms of **1** obtained on GC electrode,  $E_0 = 1.57\text{V}$   $87\text{mkA}$

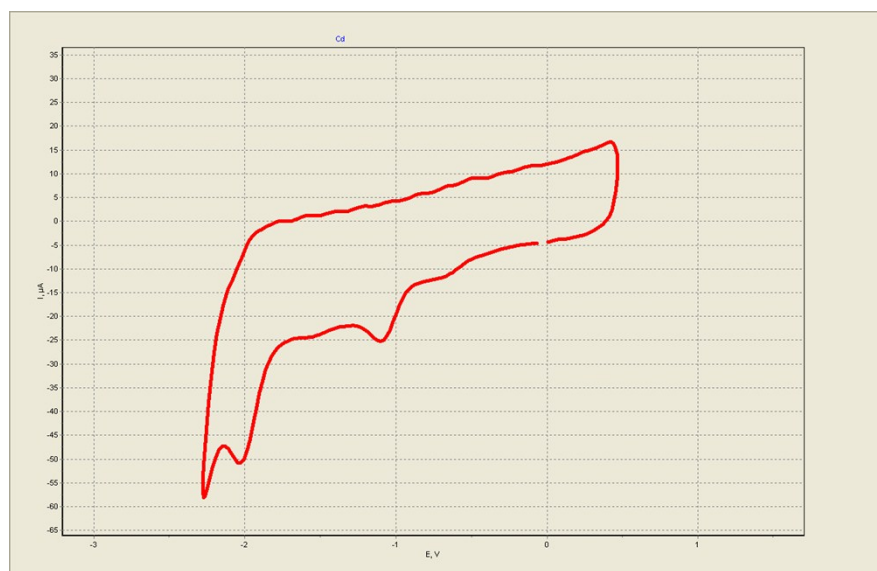

**Fig. S15.** Cyclic voltammograms of **1** obtained on GC electrode,  $E_0 = -1.02\text{V}$   $13\text{mkA}$   $2.E_0 = -1.97\text{V}$   $29\text{mkA}$ .

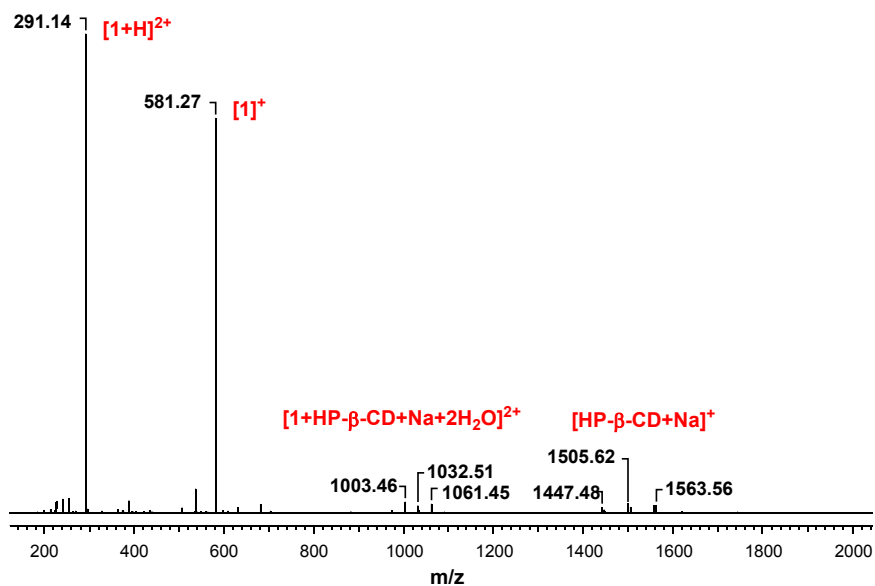

**Fig. S16.** – Mass-spectrum of **1** ( $C_1 = 2 \cdot 10^{-5}M$ ) in the presence of **HP- $\beta$ -CD** ( $C_{HP-\beta-CD} = 1 \cdot 10^{-4}M$ ) and  $NaClO_4$  ( $C_{NaClO_4} = 4 \cdot 10^{-5}M$ ) in water.

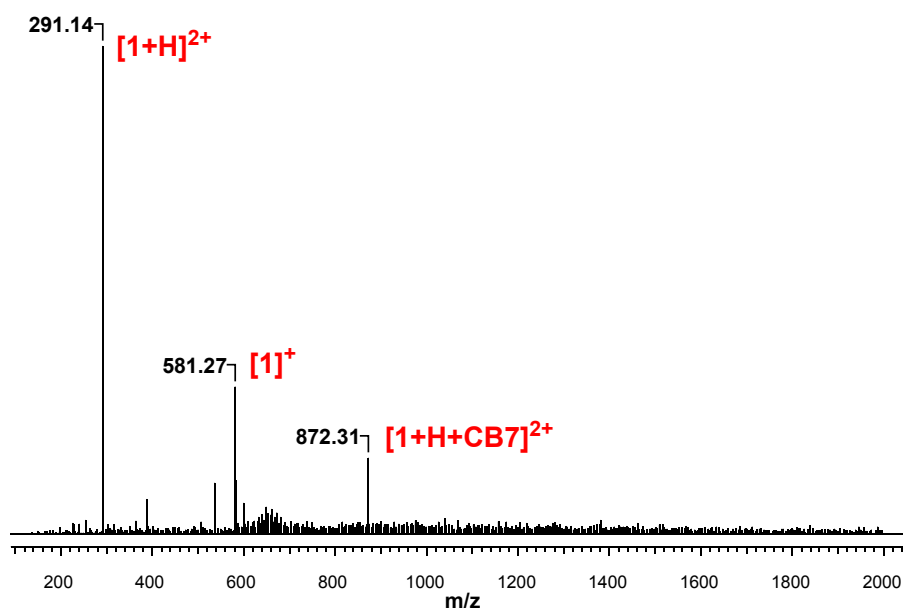

**Fig. S17.** – Mass-spectrum of **1** ( $C_1 = 2 \cdot 10^{-5}M$ ) in the presence of **CB[7]** ( $C_{CB[7]} = 1 \cdot 10^{-5}M$ ) and  $NaClO_4$  ( $C_{NaClO_4} = 4 \cdot 10^{-5}M$ ) in water.

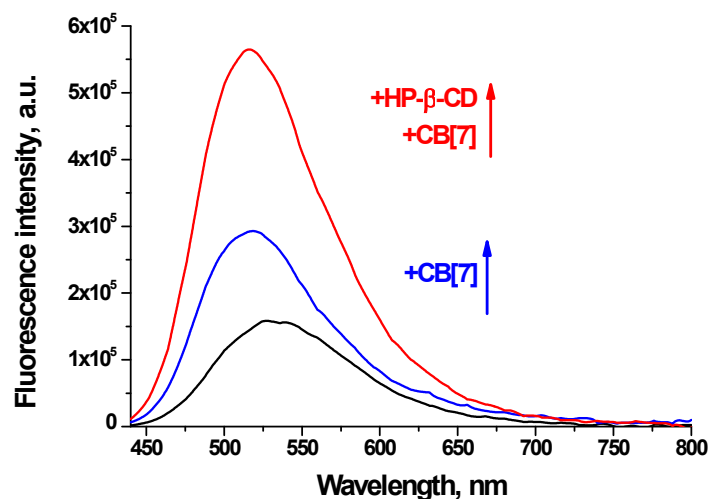

**Fig. S18.** – Fluorescence emission spectra of free **1** (black) and in the presence of:  $7 \cdot 10^{-4}$  M **CB[7]** (blue),  $1.5 \cdot 10^{-2}$  M **HP-β-CD** and  $7 \cdot 10^{-4}$  M **CB[7]** (red) in borax buffer (pH = 9.4). Temperature 298 K, excitation at 430 nm, in all cases  $C_1 = 1.0 \cdot 10^{-5}$  M.

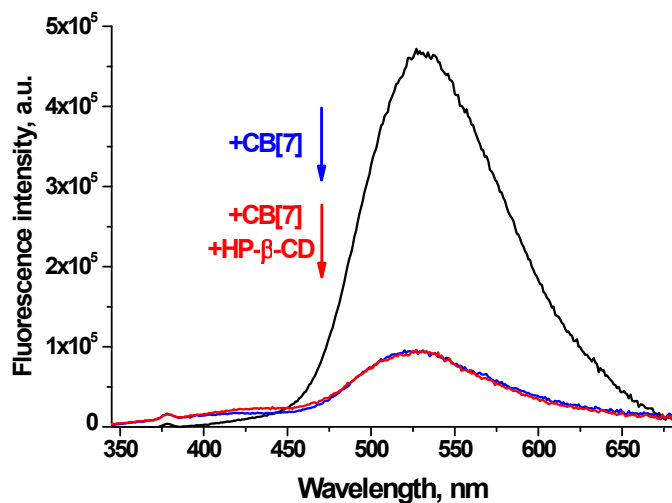

**Fig. S19.** – Fluorescence emission spectra of free **1** (black) and in the presence of:  $5 \cdot 10^{-4}$  M **CB[7]** (blue),  $1.5 \cdot 10^{-2}$  M **HP-β-CD** and  $5 \cdot 10^{-4}$  M **CB[7]** (red) in borax buffer (pH = 9.4). Temperature 298 K, excitation at 335 nm, in all cases  $C_1 = 1.0 \cdot 10^{-5}$  M.

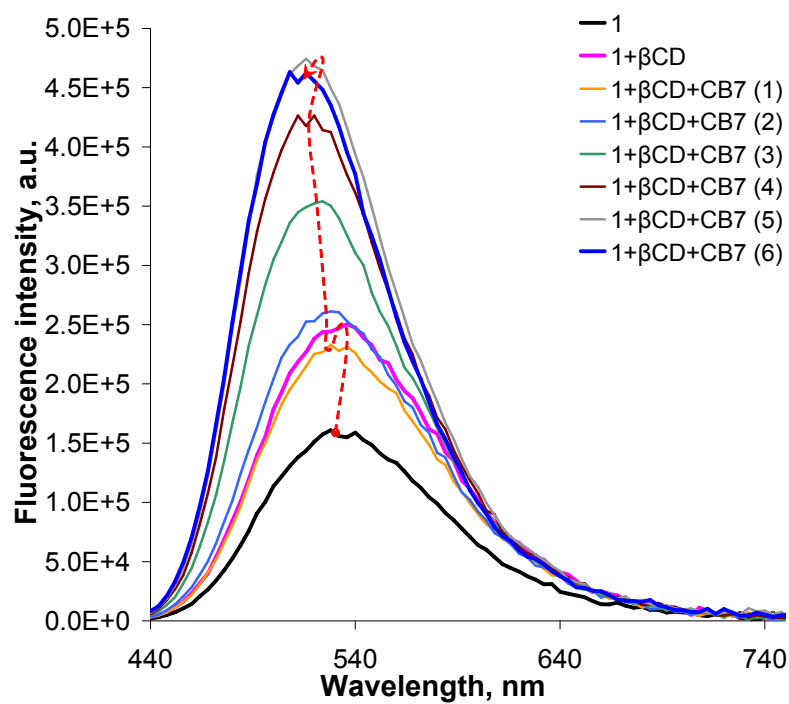

**Fig. S20.** Fluorescence emission spectra of free **1** (black) ( $C_1=9.8 \cdot 10^{-6}$  M) and in the presence of: **HP- $\beta$ -CD** (pink) ( $C_1=9.8 \cdot 10^{-6}$  M,  $C_{\beta\text{CD}}=2.2 \cdot 10^{-3}$  M), **HP- $\beta$ -CD** and **CB[7]** (blue) ( $C_1=7.9 \cdot 10^{-6}$  M,  $C_{\beta\text{CD}}=1.7 \cdot 10^{-3}$  M,  $C_{\text{CB7}}=3.9 \cdot 10^{-4}$  M) in borax buffer (pH = 9.4). Temperature 298 K, excitation at 430 nm.

a)

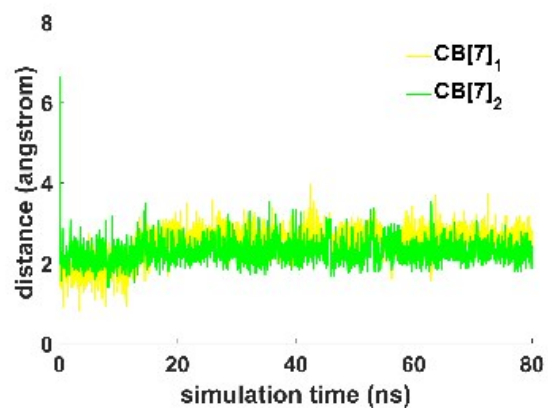

b)

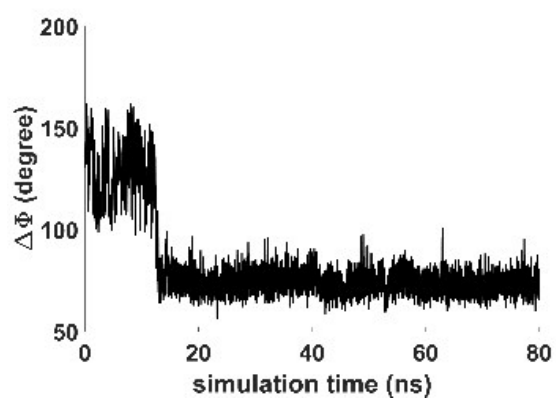

c)

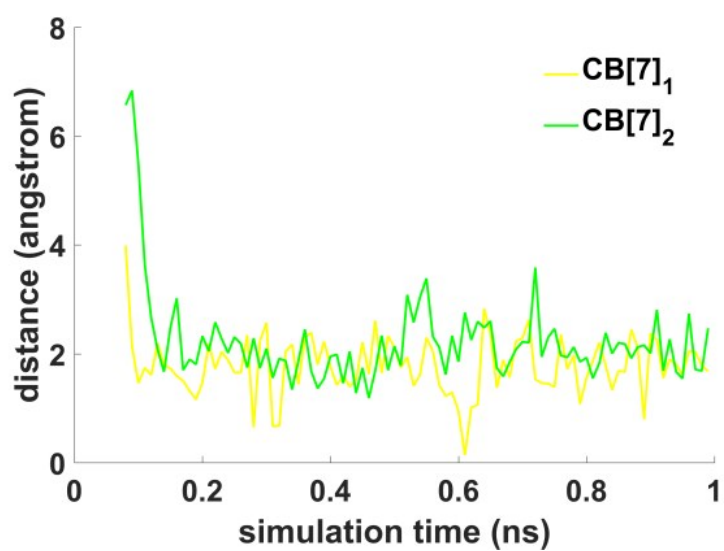

d)

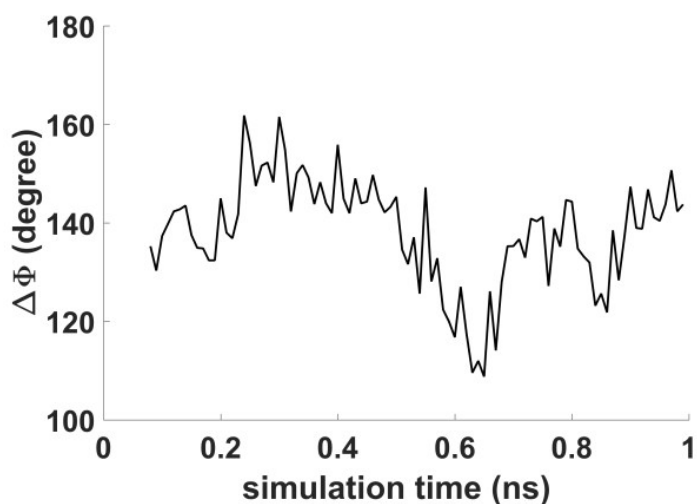

**Fig.S21** a) The evolution of the distance between mass centers of terminal pyridine moieties and carbonyl portals of CB[7], farthest from the N-atoms; b) The evolution of the angle between the vector connecting the centers of mass of the terminal pyridine moieties and the center of mass of oxygen atoms of 18-crown-6 ether; c) and d) The evolution of the data presented in Fig. S21a,b at the initial stage of calculations with a duration of 1 ns.

a)

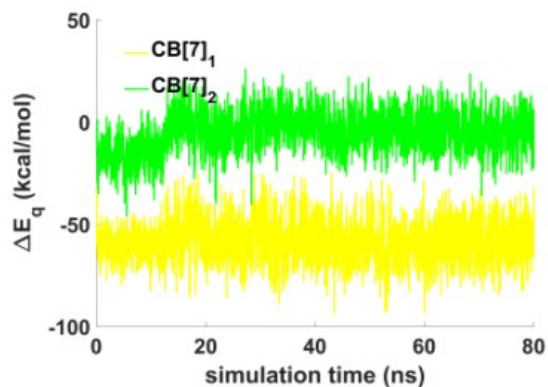

b)

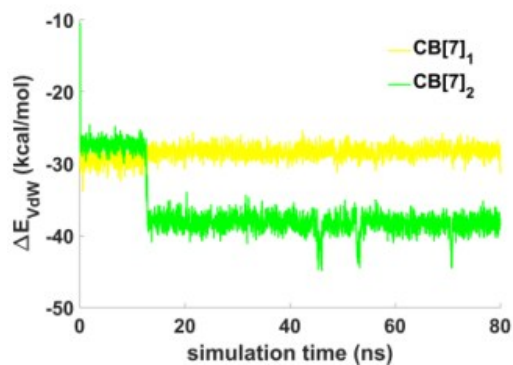

c)

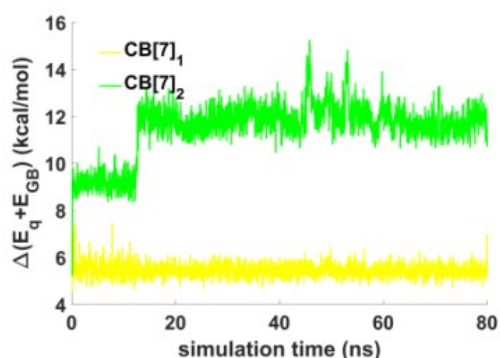

d)

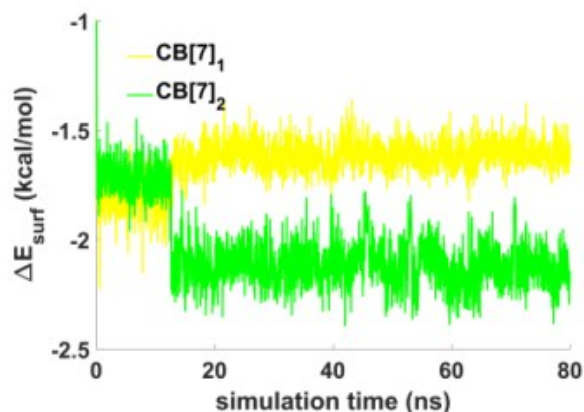

**Fig.S22** a) This is the contribution of  $E_q$ ; b) is the sum of  $E_q$  and  $E_{GB}$ ; c) is the contribution of  $E_{vdw}$ ; d) is the contribution of  $E_{surf}$ . The line marked as  $CB[7]_1$  refers to the interaction of  $CB[7]$  with N-methyl-4-styryl-pyridinium residue; the line marked as  $CB[7]_2$  refers to the interaction of  $CB[7]$  with 4-styryl-pyridine residue, all in the complex  $1@(CB[7])_2$ .

a)

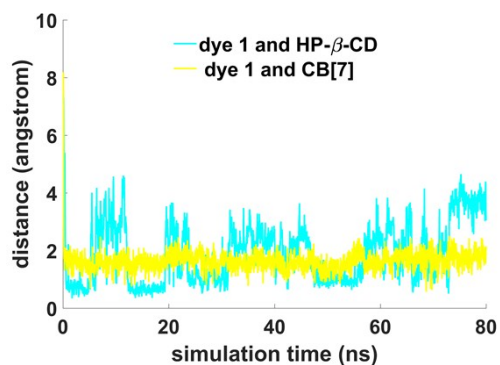

b)

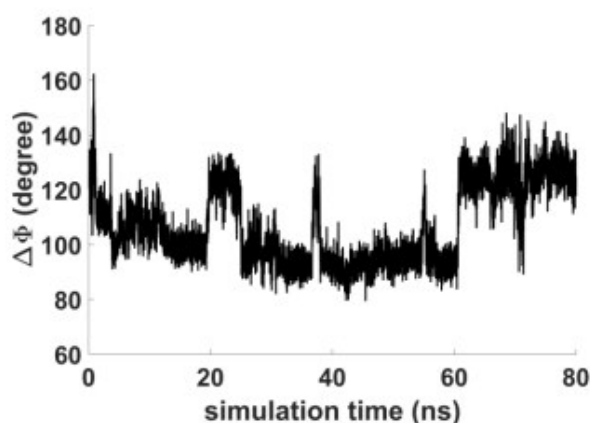

**Fig. S23** a) The evolution of the distance between mass centers of terminal pyridine moieties and carbonyl portals in case of  $CB[7]$ , and the center of mass of the oxygen in the hydroxyl groups of the pyranoses in case of  $HP-\beta-CD$ , farthest from the N-atoms; b) The evolution of the angle between the vector connecting the centers of mass of the terminal pyridine moieties and the center of mass of oxygen atoms of 18-crown-6 ether.



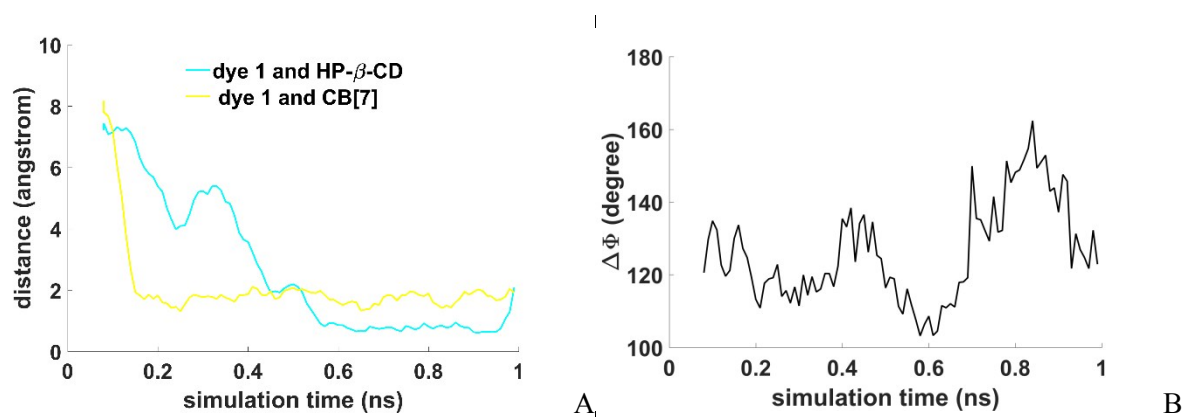

**Fig.S24** The evolution of the data presented in Fig. 13 at the initial stage of calculations at duration of 1 ns.

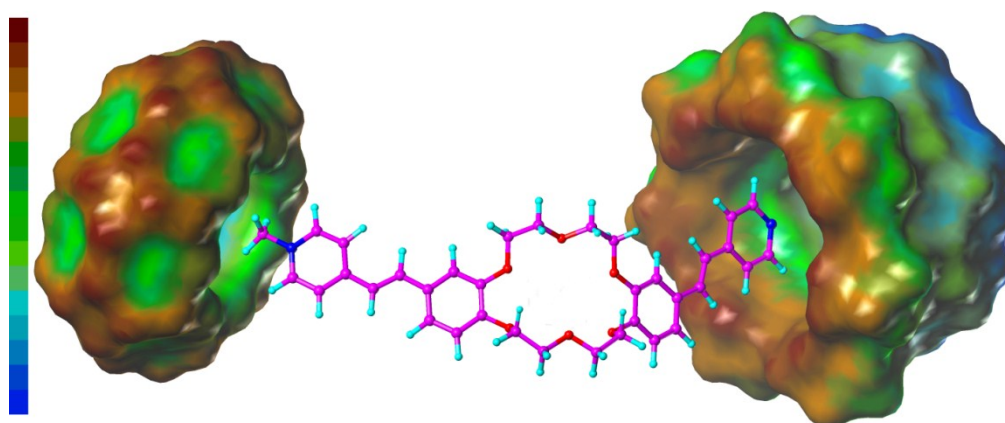

**Fig.S25** Starting position of components of dye 1, CB[7] and HP- $\beta$ -CD molecules relative to each other. The CB[7] and HP- $\beta$ -CD are covered with a Connolly surface, which is colored depending on the distribution of the hydrophobic potential from smallest (blue) to (brown).

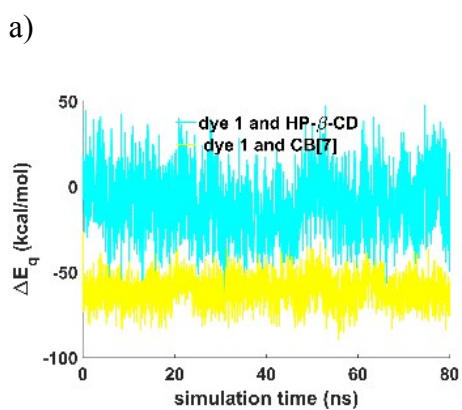

b)

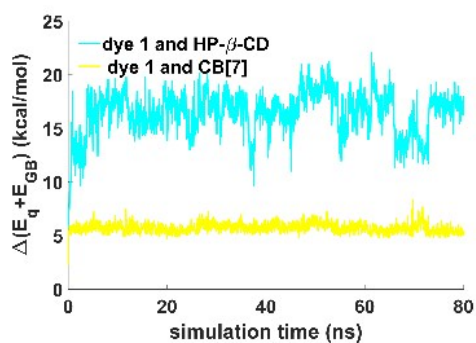

c)

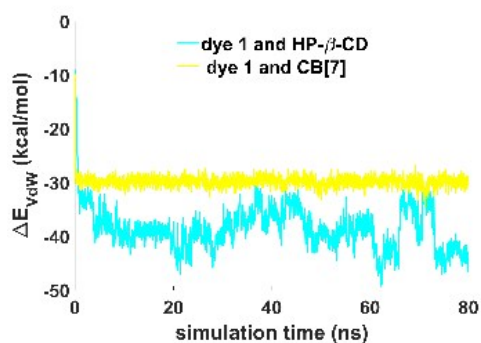

d)

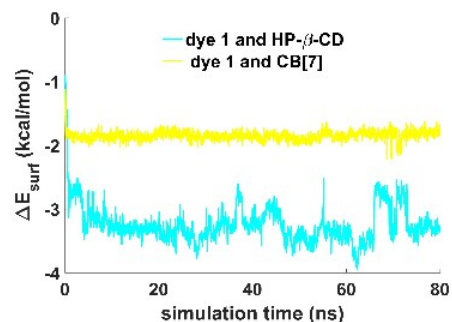

**Fig. S26** a) This is the contribution of  $E_q$ ; b) is the sum of  $E_q$  and  $E_{GB}$ ; c) is the contribution of  $E_{vdw}$ ; d) is the contribution of  $E_{surf}$ . The line marked as (dye 1 and HP- $\beta$ -CD) refers to the interaction of HP- $\beta$ -CD with 4-styryl-pyridine residue; and the line marked as (dye 1 and CB[7]) refers to the interaction of CB[7] with N-methyl-4-styryl-pyridinium residue, all in the complex HP- $\beta$ -CD@1@CB[7].

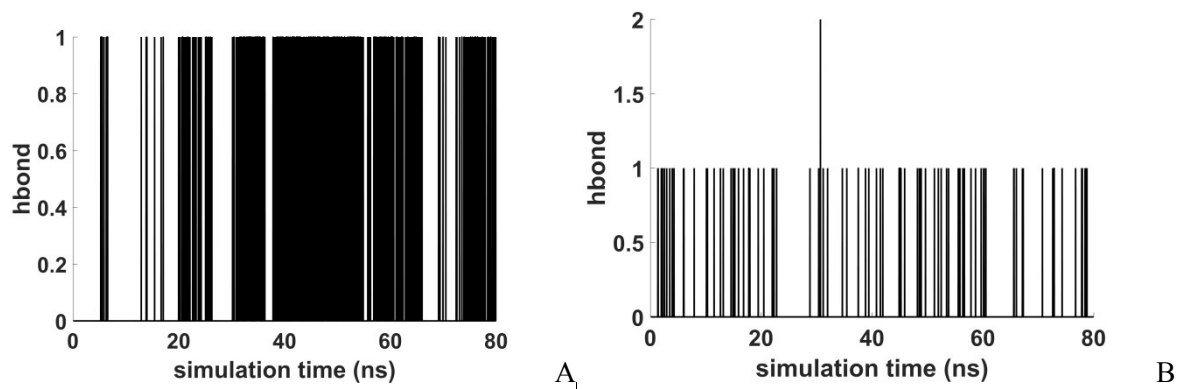

**Fig. S27** (A) – The evolution of the amount of hydrogen bonds between CB[7] and HP-β-CD. (B) - The evolution of the amount of hydrogen bonds between dye 1 and HP-β-CD.
